RESEARCH ARTICLE

# Amyloid fibril composition within hereditary Val30Met (*p. Val50Met*) transthyretin amyloidosis families

Ole Bernt Suhr<sup>1\*</sup>, Jonas Wixner<sup>1</sup>, Intissar Anan<sup>1</sup>, Hans-Erik Lundgren<sup>1</sup>, Priyantha Wijayatunga<sup>2</sup>, Per Westermark<sup>3</sup>, Elisabet Ihse<sup>3</sup>

**1** Department of Public Health and Clinical Medicine, Umeå University, Umeå, Sweden, **2** Department of Statistics, Umeå University, Umeå, Sweden, **3** Department of Immunology, Genetics and Pathology, Uppsala University, Uppsala, Sweden

\* [Ole.suhr@umu.se](mailto:Ole.suhr@umu.se)

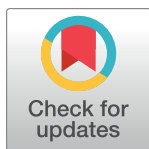

## Abstract

### Background

The amyloid fibril in hereditary transthyretin (TTR) Val30Met (pVal50Met) amyloid (ATTR Val30Met) amyloidosis is composed of either a mixture of full-length and TTR fragments (Type A) or of only full-length TTR (Type B). The type of amyloid fibril exerts an impact on the phenotype of the disease, and on the outcome of diagnostic procedures and therapy. The aim of the present study was to investigate if the type of amyloid fibril remains the same within ATTR Val30Met amyloidosis families.

### Methods

Fifteen families were identified in whom at least two first-degree relatives had their amyloid fibril composition determined. The type of ATTR was determined by Western blot in all but two patients. For these two patients a positive 99mTc-3,3-diphosphono-1,2-propanodicarboxylic acid scintigraphy indicated ATTR Type A.

### Results

In 14 of the 15 families, the same amyloid fibril composition was noted irrespective of differences in age at onset. In the one family, different ATTR fibril types was found in two brothers with similar ages at onset.

### Conclusions

Family predisposition appears to have an impact on amyloid fibril composition in members of the family irrespective of their age at onset of disease, but if genetically determined, the gene/genes are likely to be situated at another location than the TTR gene in the genome.

## OPEN ACCESS

**Citation:** Suhr OB, Wixner J, Anan I, Lundgren H-E, Wijayatunga P, Westermark P, et al. (2019) Amyloid fibril composition within hereditary Val30Met (*p. Val50Met*) transthyretin amyloidosis families. PLoS ONE 14(2): e0211983. <https://doi.org/10.1371/journal.pone.0211983>

**Editor:** Pavel Strnad, Medizinische Fakultät der RWTH Aachen, GERMANY

**Received:** November 2, 2018

**Accepted:** January 23, 2019

**Published:** February 27, 2019

**Copyright:** © 2019 Suhr et al. This is an open access article distributed under the terms of the [Creative Commons Attribution License](https://creativecommons.org/licenses/by/4.0/), which permits unrestricted use, distribution, and reproduction in any medium, provided the original author and source are credited.

**Data Availability Statement:** All relevant data are within the paper.

**Funding:** This work was supported by: The Swedish Heart and Lung foundation grant no. 20160787, <https://www3.hjart-lungfonden.se/> (OBS); the patient organisation FAMY/ AMYL, Väster- and Norrbotten, <https://www.famy.se/> and <https://www.famynorrbotten.se/sv-SE> (OBS, PW); and Selander's foundation, <https://www.stiftelsemedel.se/erik-karin-och-gsta-selanders-stiftelse/> (PW). The funders had no role in study

design, data collection and analysis, decision to publish, or preparation of the manuscript.

**Competing interests:** The authors have declared that no competing interests exist.

## Introduction

Hereditary transthyretin amyloid (ATTRv) amyloidosis is a fatal autosomal dominant inherited systemic amyloidosis. The mechanism leading to amyloid formation has not been fully elucidated, and it appears that different pathways are operating [1]. The prevailing theory suggests that the majority of transthyretin (TTR) mutations lead to instability of the TTR tetramer; this further leads to dissociation of the tetramer into monomers that after misfolding subsequently reassemble into TTR amyloid (ATTR) fibrils [2]. However, ATTR rarely consists of only full-length TTR since C-terminal fragments, cleaved mainly at position 46, 49 or 52, are also often found in the deposits. In fact, ATTR fibrils consisting entirely of uncleaved TTR (Type B) so far have been found solely in patients with the TTR Val30Met (*p. Val50Met*), Phe64Leu (*p. Phe84Leu*), Glu74Asp (*p. Glu94Asp*), and Tyr114Cys (*p. Tyr134 Cys*) mutations; furthermore, Type B fibrils mostly occur in a subgroup of patients that are predominantly characterised by early onset of their disease [3–6]. In addition, wild type TTR is also amyloidogenic, and wild type ATTR always consists of a mixture of cleaved and full-length TTR (Type A) [7, 8]. So far, the same amyloid fibril composition type has been found within an individual patient irrespective of the organ examined, e.g., the amyloid fibril composition in the heart is the same as in the subcutaneous fat [4].

The amyloid fibril composition has important clinical implications, both regarding diagnostic tests, phenotype of the disease, and on response to treatment since early onset ATTR Val30Met amyloidosis patients, who predominantly carry type B fibrils, display superior survival after liver transplantation and after Tafamidis (a TTR stabiliser) treatment [1, 9–11]. In addition, after liver transplantation, a slower increase of wild type TTR in type B patients' ATTR deposits were found compared with that for type A [12]. Marked difference in phenotype have also been observed, based on the Congoophilic properties of ATTR deposits that reflect the amyloid fibril composition, where type A fibrils display low affinity for Congo red staining in contrast to a high affinity for type B fibrils. Thus, for patients with an early onset originating from endemic areas, a higher amount of variant TTR was found in their ATTR deposits that displayed a high affinity for Congo red staining [13]. Interestingly, differences have also been noted for nerve damage, where the classical small fibre peripheral neuropathy was related to elongation of the ATTR fibrils, i.e., a finding noted in patients with type B amyloid deposits [7, 14].

The mechanism behind the formation of two fibril types is virtually unknown. A mechano-enzymatic cleavage process has been suggested [15] where mechanical force on the circulating TTR in conjunction with its passage through the heart leads to a dislocation of the TTR's D-loop, which is then exposed to enzymatic cleavage by plasmin [16]. After this the tetramer is broken up into monomers facilitating formation of amyloid fibrils consisting of C-terminal TTR fragments and full-length TTR, i.e., Type A fibrils. However, Type A fibrils have also been found in material of the corpus vitreous obtained from vitrectomised ATTR Val30Met amyloidosis patients' eyes, and in the spinal cord of diseased ATTRVal30Met patients [6, 17]. Since a mechano-enzymatic cleavage of TTR is unlikely to occur in the eye or central nervous system alternative mechanisms must be operating.

The aim of the present study was to investigate the relationship between family membership and amyloid fibril composition in ATTR Val30Met amyloidosis patients, in an attempt to better understand the underlying cause of the two fibril conformation types. The hypothesis was that amyloid fibril composition is inherited within families, i.e., determined by genetic factors. Our results support the hypothesis.

## Material and methods

To evaluate the ATTR fibril composition within ATTR Val30Met families, we conducted a retrospective study on ATTR Val30Met amyloidosis families at our centre, which is a tertiary reference centre for ATTR amyloidosis.

During the last 10 years, we have performed fat pad biopsies with typing of amyloid deposits, and if ATTR is found we determined the type of ATTR fibril, i.e., Type A or Type B. To explore the families and their amyloid fibril types, we scrutinised our patient material at the Amyloid Centre at Umeå University Hospital for ATTR Val30Met families in which two or more first degree relatives had had their amyloid fibril composition determined. The diagnosis in all patients was verified by positive gene sequencing or PCR examination for the TTR Val30Met mutation. Amyloid deposition was detected in an abdominal fat pad biopsy by Congo red staining and examination under polarised light with crossed polars. The type of ATTR fibril was determined by Western blot utilising a rabbit antiserum against an *in vitro* expressed C-terminal fragment of TTR (TTR50-127), diluted 1:5000 that recognises both full-length and C-terminal TTR fragments as previously described [4]. In two patients, the fibril type was settled by <sup>99m</sup>Tc-3,3-diphosphono-1,2-propanodicarboxylic acid (DPD) scintigraphy [18]. Prism 7 statistical software was used for statistical analysis. Differences between groups were analysed by the Mann-Whitney test. To analyse the probability of finding the same fibril type within the families, empirical probabilities were determined and bootstrap confidence intervals were calculated from 10,000 resamples with replacements of same sample size from the original sample of observations.

The study was approved by the Regional Ethics Committee at Umeå University. Dnr 2017-447-31M.

## Results

Fifteen families in which at least two first degree family members had had their amyloid fibril composition determined were identified. The total number of patients was 31. The type of ATTR was settled by Western blot in all but two patients. For these two patients, for whom the amyloid content in the fat pad biopsy was insufficient for typing, a positive DPD-scintigraphy suggested ATTR Type A, as it has previously been shown that patients with Type B fibrils have negative DPD-scintigraphies [18]. The families and their amyloid fibril composition type together with age at onset and outcome of DPD-scintigraphy are summarised in Table 1. In 14 of the 15 families, the same amyloid fibril composition was noted in the family members, while in one family, two brothers, both with an onset of their disease at the age of 67 years, displayed different fibril types (Fig 1) (family IV). The empirical probability of observing the same fibril type within a family was 0.93 with a bootstrap 95% confidence interval (CI) 0.8–1.0. Corresponding values calculated from those families with confirmation of their fibril type by Western blot were 0.93 with a bootstrap CI of 0.7857–1.

Six families contained a parent and a child, and for three of these families (VI, VIII and XI), there was a disparity in the age of onset of more than 10 years (13, 25 and 15 years, respectively).

Expectedly, patients with Type A ATTR fibrils were significantly older at disease onset than those with Type B fibrils (median 67 and 44 years respectively;  $P < 0.0002$ ; Fig 2). However, in line with what was shown previously, there was an overlap between the fibril types and age of onset such that either fibril type can be found in patients with an age of onset between approximately 45–70 years.

## Discussion

The most important finding was the consistency of amyloid fibril composition within all but one of the families. This substantial consistency of amyloid fibril composition type within the

**Table 1. Amyloid fibril composition within the families.**

| Family | Family members | Age at onset of disease | Index Patient's trait from | Fibril type by DPD-scintigraphy <sup>a</sup> | Fibril type by Western blot | Fibril type by western blot/DPD-scintigraphy |
|--------|----------------|-------------------------|----------------------------|----------------------------------------------|-----------------------------|----------------------------------------------|
| Ia     | index male     | 48                      | mother                     | ND <sup>b</sup>                              | B <sup>c</sup>              | B                                            |
| Ib     | son            | 44                      |                            | B                                            | B                           | B                                            |
| IIa    | index female   | 44                      | unknown                    | B                                            | B                           | B                                            |
| IIb    | son            | 44                      | B                          | B                                            | B                           | B                                            |
| IIIa   | index female   | 67                      | unknown                    | A <sup>d</sup>                               | A                           | A                                            |
| IIIb   | brother        | 54                      |                            | A                                            | NA <sup>e</sup>             | A                                            |
| IIIc   | son to IIIb    | 46                      |                            | A                                            | A                           | A                                            |
| IVa    | index male     | 67                      | father                     | A                                            | A                           | A                                            |
| IVb    | brother        | 67                      |                            | B                                            | B                           | B                                            |
| Va     | index male     | 67                      | father                     | A                                            | A                           | A                                            |
| Vb     | brother        | 71                      |                            | A                                            | A                           | A                                            |
| VI     | index female   | 62                      | father                     | ND                                           | B                           | B                                            |
| VIb    | daughter       | 49                      |                            | ND                                           | B                           | B                                            |
| VIIa   | index female   | 60                      | unknown <sup>f</sup>       | B                                            | B                           | B                                            |
| VIIb   | brother        | 62                      |                            | ND                                           | B                           | B                                            |
| VIIIa  | index male     | 69                      | mother                     | ND                                           | B                           | B                                            |
| VIIIb  | son            | 44                      |                            | ND                                           | B                           | B                                            |
| IXa    | index male     | 43                      | father                     | B                                            | B                           | B                                            |
| IXb    | brother        | 38                      |                            | ND                                           | B                           | B                                            |
| Xa     | index male     | 39                      | mother                     | B                                            | B                           | B                                            |
| Xb     | brother        | 38                      |                            | B                                            | B                           | B                                            |
| XIa    | index male     | 63                      | mother                     | ND                                           | B                           | B                                            |
| XIb    | son            | 48                      |                            | B                                            | B                           | B                                            |
| XIIa   | index male     | 32                      | mother                     | ND                                           | B                           | B                                            |
| XIIb   | brother        | 28                      |                            | ND                                           | B                           | B                                            |
| XIIIa  | index male     | 72                      | father                     | A                                            | NA                          | A                                            |
| XIIIb  | brother        | 64                      |                            | A                                            | A                           | A                                            |
| XIVa   | index male     | 36                      | father                     | B                                            | B                           | B                                            |
| XIVb   | brother        | 29                      |                            | B                                            | B                           | B                                            |
| XVa    | index male     | 71                      | Father                     | A                                            | A                           | A                                            |
| XVb    | sister         | 65                      |                            | A                                            | A                           | A                                            |

<sup>a</sup> DPD—scintigraphy = 99mTc-3,3-diphosphono-1,2-propanodicarboxylic acid-scintigraphy, where negative scintigraphy relates to Type B fibrils, whereas positive scintigraphy relates to type A fibrils

<sup>b</sup> not done

<sup>c</sup> Type B amyloid fibrils consisting of full-length transthyretin only.

<sup>d</sup> Type A amyloid fibril consisting of a mixture of full-length and truncated transthyretin

<sup>e</sup> Amyloid fibril composition could not be determined by Western blot

<sup>f</sup> both parents deceased without symptoms of ATTR amyloidosis, but the disease was present in both parents' families.

<https://doi.org/10.1371/journal.pone.0211983.t001>

families, often in spite of a considerable difference in age at onset (up to 25 years) suggests that genetic factors play a role.

Generally, late onset patients display Type A, and early onset patients display Type B fibrils. However, it should be noted that there is not a pure correlation between fibril type and the traditional grouping of patients as early (age of onset below 50 years) and late (age of onset above 50 years) onset cases. While the majority of early onset patients will have type B fibrils, late onset patients with an age of onset below 70 years of age may also have Type B fibrils.

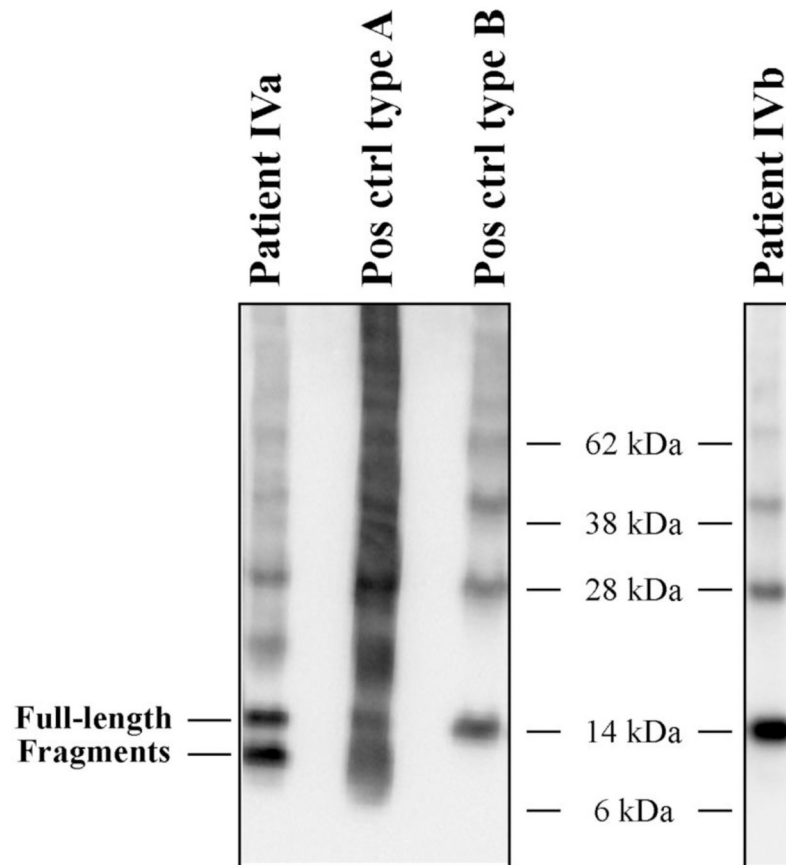

**Fig 1. The two fibril types shown by western blotting analysis.** Western blots subjected to an antiserum directed against the C-terminal part of transthyretin (amino acids 50–127) are shown for patient IVA and IVB, as well as positive controls for both fibril types. Patient IVA is seen to have a clear band below the band corresponding to the full-length monomeric transthyretin, while patient IVB does not.

<https://doi.org/10.1371/journal.pone.0211983.g001>

Domino liver transplant recipients display a similar consistency of amyloid fibril composition after transferring a mutant ATTR producing liver to a patient with end-stage liver disease. So far, all recipients of an ATTR Val30Met liver from a patient with Type B fibrils have displayed Type B fibrils irrespective of their age when they received the liver [19]. This could indicate that the determination of ATTR fibril type is regulated within the liver after synthesis of TTR, and is not dependent on extra-hepatic factors. However, we have not yet had the opportunity to examine patients receiving livers from patients displaying Type A fibrils.

The typing of amyloid deposits can be challenging. In the presented series of patients, amyloid fibril composition could not be determined from performing western blotting on fat biopsies in two patients. One patient underwent two abdominal fat pad biopsies after an initial positive heart biopsy, and even though amyloid was detected in the second fat pad biopsy, the amount was too small for Western blot analysis. In the other patient, the amount of amyloid in the fat pad biopsy was also too small for fibril typing. However, as previously reported, patients with Type A amyloid fibril generally have positive DPD scintigraphies, even in patients with normal heart dimensions, while patients with type B fibrils have negative scintigraphies [18]. Therefore, it appears reasonable to accept that the patients for whom the amyloid fibril composition could not be determined from fat pad biopsies had Type A fibrils based on their positive scintigraphic findings. In addition, the amount of amyloid in fat pad biopsies are generally



**Formal analysis:** Ole Bernt Suhr, Jonas Wixner, Intissar Anan, Hans-Erik Lundgren, Priyantha Wijayatunga, Per Westermark, Elisabet Ihse.

**Funding acquisition:** Ole Bernt Suhr, Per Westermark.

**Investigation:** Ole Bernt Suhr, Jonas Wixner, Intissar Anan, Per Westermark, Elisabet Ihse.

**Methodology:** Per Westermark.

**Project administration:** Ole Bernt Suhr.

**Resources:** Ole Bernt Suhr, Per Westermark.

**Supervision:** Per Westermark.

**Validation:** Per Westermark, Elisabet Ihse.

**Visualization:** Elisabet Ihse.

**Writing – original draft:** Ole Bernt Suhr.

**Writing – review & editing:** Ole Bernt Suhr, Jonas Wixner, Intissar Anan, Hans-Erik Lundgren, Priyantha Wijayatunga, Per Westermark, Elisabet Ihse.

## References

1. Suhr OB, Lundgren E, Westermark P. One mutation, two distinct disease variants: unravelling the impact of transthyretin amyloid fibril composition. *J Intern Med.* 2017; 281(4):337–47. <https://doi.org/10.1111/joim.12585> PMID: 28093848
2. Hammarstrom P, Jiang X, Deechongkit S, Kelly JW. Anion shielding of electrostatic repulsions in transthyretin modulates stability and amyloidosis: insight into the chaotrope unfolding dichotomy. *Biochemistry.* 2001; 40(38):11453–9. PMID: 11560493
3. Ihse E, Rapezzi C, Merlini G, Benson MD, Ando Y, Suhr OB, et al. Amyloid fibrils containing fragmented ATTR may be the standard fibril composition in ATTR amyloidosis. *Amyloid.* 2013; 20(3):142–50. <https://doi.org/10.3109/13506129.2013.797890> PMID: 23713495
4. Ihse E, Ybo A, Suhr O, Lindqvist P, Backman C, Westermark P. Amyloid fibril composition is related to the phenotype of hereditary transthyretin V30M amyloidosis. *J Pathol.* 2008; 216(2):253–61. <https://doi.org/10.1002/path.2411> PMID: 18729067
5. Tasaki M, Lavatelli F, Minnella AM, Di Girolamo M, Antoniazzi E, Bozzola M, et al. Characteristics of TTR fragmentation pattern in ATTR patients carrying various mutations. In: Ando Y, editor. *the XVIIth International Symposium on Amyloidosis*; Kumamoto, n Japa2018. p. 80.
6. Oshima T, Kawahara S, Ueda M, Kawakami Y, Tanaka R, Okazaki T, et al. Changes in pathological and biochemical findings of systemic tissue sites in familial amyloid polyneuropathy more than 10 years after liver transplantation. *J Neurol Neurosurg Psychiatry.* 2014; 85(7):740–6. <https://doi.org/10.1136/jnnp-2013-305973> PMID: 24023270
7. Bergstrom J, Gustavsson A, Hellman U, Sletten K, Murphy CL, Weiss DT, et al. Amyloid deposits in transthyretin-derived amyloidosis: cleaved transthyretin is associated with distinct amyloid morphology. *J Pathol.* 2005; 206(2):224–32. <https://doi.org/10.1002/path.1759> PMID: 15810051
8. Gustavsson A, Jahr H, Tobiassen R, Jacobson DR, Sletten K, Westermark P. Amyloid fibril composition and transthyretin gene structure in senile systemic amyloidosis. *Lab Invest.* 1995; 73(5):703–8. PMID: 7474944
9. Coelho T, Ines M, Conceicao I, Soares M, de Carvalho M, Costa J. Natural history and survival in stage 1 Val30Met transthyretin familial amyloid polyneuropathy. *Neurology.* 2018; 91:1–11.
10. Ericzon BG, Wilczek HE, Larsson M, Wijayatunga P, Stangou A, Pena JR, et al. Liver Transplantation for Hereditary Transthyretin Amyloidosis: After 20 Years Still the Best Therapeutic Alternative? *Transplantation.* 2015; 99(9):1847–54. <https://doi.org/10.1097/TP.0000000000000574> PMID: 26308415
11. Gustafsson S, Ihse E, Henein MY, Westermark P, Lindqvist P, Suhr OB. Amyloid fibril composition as a predictor of development of cardiomyopathy after liver transplantation for hereditary transthyretin amyloidosis. *Transplantation.* 2012; 93(10):1017–23. <https://doi.org/10.1097/TP.0b013e31824b3749> PMID: 22395298
12. Ihse E, Suhr OB, Hellman U, Westermark P. Variation in amount of wild-type transthyretin in different fibril and tissue types in ATTR amyloidosis. *J Mol Med (Berl).* 2011; 89(2):171–80.

13. Koike H, Ando Y, Ueda M, Kawagashira Y, Iijima M, Fujitake J, et al. Distinct characteristics of amyloid deposits in early- and late-onset transthyretin Val30Met familial amyloid polyneuropathy. *J Neurol Sci.* 2009; 287(1–2):178–84. <https://doi.org/10.1016/j.jns.2009.07.028> PMID: 19709674
14. Koike H, Nishi R, Ikeda S, Kawagashira Y, Iijima M, Sakurai T, et al. The morphology of amyloid fibrils and their impact on tissue damage in hereditary transthyretin amyloidosis: An ultrastructural study. *J Neurol Sci.* 2018; 394:99–106. <https://doi.org/10.1016/j.jns.2018.09.011> PMID: 30243104
15. Marcoux J, Mangione PP, Porcari R, Degiacomi MT, Verona G, Taylor GW, et al. A novel mechano-enzymatic cleavage mechanism underlies transthyretin amyloidogenesis. *EMBO molecular medicine.* 2015; 7(10):1337–49. <https://doi.org/10.15252/emmm.201505357> PMID: 26286619
16. Mangione PP, Verona G, Corazza A, Marcoux J, Canetti D, Giorgetti S, et al. Plasminogen activation triggers transthyretin amyloidogenesis in vitro. *The Journal of biological chemistry.* 2018; 293(37):14192–9. <https://doi.org/10.1074/jbc.RA118.003990> PMID: 30018138
17. Sandgren O, Westermark P, Stenkula S. Relation of vitreous amyloidosis to prealbumin. *Ophthalmic research.* 1986; 18(2):98–103. <https://doi.org/10.1159/000265422> PMID: 3090496
18. Pilebro B, Suhr OB, Naslund U, Westermark P, Lindqvist P, Sundstrom T. (99m)Tc-DPD uptake reflects amyloid fibril composition in hereditary transthyretin amyloidosis. *Upsala journal of medical sciences.* 2016; 121(1):17–24. <https://doi.org/10.3109/03009734.2015.1122687> PMID: 26849806
19. Westermark P, Nowak G, Suhr OB, Ericzon BG. Domino liver transplantation: full-length transthyretin in donor and recipient patients with ATTR Val30Met amyloidosis. *Amyloid.* 2017; 24(sup1):128–9. <https://doi.org/10.1080/13506129.2017.1294058> PMID: 28434334
20. Ikeda S, Sekijima Y, Tojo K, Koyama J. Diagnostic value of abdominal wall fat pad biopsy in senile systemic amyloidosis. *Amyloid.* 2011; 18(4):211–5. <https://doi.org/10.3109/13506129.2011.623199> PMID: 22004460
